# Supplementary material
Source: PubMed Central journal article supplement (PMC2570860)
Supplement: M804782200_1.pdf [file M804782200_1.pdf]

### Supplementary Information:

For a bimolecular complex such as PLB-SERCA, the FRET pair separation distance may be obtained from the fit parameter  $\text{FRET}_{\max}$  using the Förster relationship  $R = (R_0)[(1/\text{FRET}_{\max})-1]^{1/6}$  (1). Pentameric PLB, however, presents an example of a FRET complex with multiple donors and acceptors. Li et al (2) developed a model for FRET within a ring-shaped oligomer, specifically for application to PLB but of general utility. This model assumes random mixing of donor:acceptor ratio and a symmetric ring-shaped assembly of PLB subunits. For a given donor, each additional subunit (indexed by  $j$ ) will add energy transfer rate  $k_j$  with acceptor probability  $P_a$  to all previous terms, but will not affect the rate of any terms with donor probability  $(1-P_a)$ , such that the donor fluorescence intensity decay of  $n$ -mer is given by

$$\frac{F(t)}{F(0)} = \exp(-k_D t) \prod_{j=2}^n [1 - p_a + p_a \exp(-k_j t)] \quad (\text{Eqn. 1})$$

where  $k_D$  is the decay rate of the donor alone. The term  $k_j$  is given by  $k_j = k_D \left( \frac{r_j}{R_0} \right)^{-6} = k_D \left[ \frac{R \sin(\frac{\pi(j-1)}{n})}{R_0 \sin(\frac{\pi}{n})} \right]^{-6}$  where

$R_0$  is the Förster distance,  $r_j$  is the distance between the donor and the acceptor on subunit  $j$  in the  $n$ -mer ring and  $R$  is the distance between fluorophores on adjacent subunits. If oligomers are in equilibrium with a molar fraction  $X$  of monomers, and assuming that  $E = 0$  for these monomeric donors, the observed steady-state energy transfer efficiency is given by

$$E_{\text{OBS}} = (1 - X) \left\{ 1 - \frac{F_{\text{DA}}(0)}{F_{\text{D}}(0)} \int_0^\infty \exp(-k_D t) \prod_{j=2}^n [1 - p_a + p_a \exp(-k_j t)] dk_D t \right\} \quad (\text{Eqn. 2})$$

A MatLab simulation that implements Eqn. 2 was used to analyze PLB-PLB FRET data, using a pentamer as the major oligomeric species. Since the measured  $\text{FRET}_{\max}$  value represents the intrinsic FRET of the complex, monomer fraction  $X = 0$ . The mole fraction acceptor is empirically determined from the starting fluorescence of YFP and the final fluorescence of CFP. This analysis yields the subunit distance  $R/R_0$ . Supplementary Fig. 1 is a 3D representation of the relationship plotted in Fig. 1A.

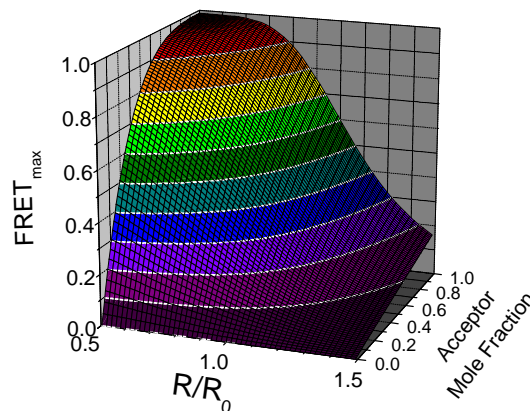

Supplementary Fig. 1. Simulated dependence of FRET on probe separation and acceptor mole fraction.

1. Förster, T. (1948) *Ann. Phys. (Leipzig)* **2**, 55-75
2. Li, M., Reddy, L. G., Bennett, R., Silva, N. D., Jr., Jones, L. R., and Thomas, D. D. (1999) *Biophys J* **76**(5), 2587-2599
